# Supplementary material for: Basal and cold-induced fatty acid uptake of human brown adipose tissue is impaired in obesity
Source: PubMed Central journal article supplement (PMC7463032; doi:10.1038/s41598-020-71197-2), 2020-09-01
Supplement: 41598_2020_71197_MOESM1_ESM.pdf [file 41598_2020_71197_MOESM1_ESM.pdf]

## **Basal and cold-induced fatty acid uptake of human brown adipose tissue is impaired in obesity**

Saari TJ<sup>1,2</sup>, Raiko J<sup>2</sup>, U-Din M<sup>1, 2</sup>, Niemi T<sup>3</sup>, Taittonen M<sup>4</sup>, Laine J<sup>5</sup>, Savisto N<sup>2</sup>, Haaparanta-Solin M<sup>2,6</sup>,  
Nuutila P<sup>1, 2</sup>, Virtanen KA<sup>1, 2, 7,\*</sup>

<sup>1</sup> Turku PET Centre, Turku University Hospital, Kiinamylyynkatu 4-8, 20520, Turku, Finland

<sup>2</sup> Turku PET Centre, University of Turku, Kiinamylyynkatu 4-8, 20520, Turku, Finland

<sup>3</sup> Department of Surgery, Turku University Hospital, Kiinamylyynkatu 4-8, 20520, Turku, Finland

<sup>4</sup> Department of Anesthesiology, Turku University Hospital, Kiinamylyynkatu 4-8, 20520 Turku, Finland

<sup>5</sup> Department of Pathology, Turku University Hospital, Kiinamylyynkatu 4-8, 20520, Turku, Finland

<sup>6</sup> MediCity Research Laboratories, University of Turku, Tykistökatu 6A, 20520, Turku, Finland

<sup>7</sup> Institute of Public Health and Clinical Nutrition, University of Eastern Finland, PL 1627, 70211, Kuopio,  
Finland

\* Corresponding author

Corresponding author contact information:

Kirsi A. Virtanen, MD, PhD

Adjunct professor/Docent

Turku PET Centre

Turku University Hospital and University of Turku

Kiinamylyynkatu 4-8

20520 Turku

mobile +358 40 7626564

email: [kirsi.virtanen@utu.fi](mailto:kirsi.virtanen@utu.fi) or [kirsi.virtanen@tyks.fi](mailto:kirsi.virtanen@tyks.fi)

**Supplementary Table 1.** General characteristics of histologically proven BAT positive (BAT<sup>(+)</sup>) and BAT negative subjects (BAT<sup>(-)</sup>) and measurements taken at baseline, and during cold exposure or room temperature scans. Values are presented as mean  $\pm$  SD.

|                                                                                             |                                                 | Histologically evident BAT-positive<br>n = 7 | Histologically evident BAT-negative n = 24 | p-value |
|---------------------------------------------------------------------------------------------|-------------------------------------------------|----------------------------------------------|--------------------------------------------|---------|
| Age (years)                                                                                 |                                                 | 27.57 $\pm$ 7.7                              | 40.52 $\pm$ 10.68                          | 0.004   |
| Gender (M/F)                                                                                |                                                 | 4F / 3M                                      | 10F / 11M                                  |         |
| BMI (kg/m <sup>2</sup> )                                                                    |                                                 | 24.8 $\pm$ 3.0                               | 28.11 $\pm$ 5.05                           | 0.050   |
| Waist circumference (cm)                                                                    |                                                 | 85.71 $\pm$ 10.87                            | 94.98 $\pm$ 18.86                          | 0.13    |
| M-value (mg/kg/min)                                                                         |                                                 | 7.35 $\pm$ 2.14                              | 6.34 $\pm$ 3.92                            | 0.40    |
| Fat percentage of weight (%)                                                                |                                                 | 30.26 $\pm$ 9.37                             | 30.55 $\pm$ 8.60                           | 0.5     |
| HDL cholesterol (mmol/L)                                                                    |                                                 | 1.74 $\pm$ 0.42                              | 1.49 $\pm$ 0.39                            | 0.207   |
| LDL cholesterol (mmol/L)                                                                    |                                                 | 2.71 $\pm$ 0.95                              | 2.84 $\pm$ 0.67                            | 0.76    |
| Total cholesterol (mmol/L)                                                                  |                                                 | 4.57 $\pm$ 0.88                              | 4.82 $\pm$ 0.72                            | 0.526   |
| Triglycerides (mmol/L)                                                                      |                                                 | 0.81 $\pm$ 0.21                              | 1.05 $\pm$ 0.71                            | 0.205   |
| HbA <sub>1c</sub> (mmol/mol)                                                                |                                                 | 33.19 $\pm$ 4.21                             | 35.47 $\pm$ 4.50                           | 0.248   |
| Alanine transaminase (U/L)                                                                  |                                                 | 19.57 $\pm$ 10.39                            | 29.15 $\pm$ 15.50                          | 0.086   |
| Gamma-glutamyltransferase (U/L)                                                             |                                                 | 15.86 $\pm$ 7.82                             | 27.45 $\pm$ 19.22                          | 0.036   |
| Alkaline phosphatase (U/L)                                                                  |                                                 | 49.0 $\pm$ 17.04                             | 64.10 $\pm$ 17.73                          | 0.065   |
| COLD EXPOSURE                                                                               | BAT Fatty Acid Uptake ( $\mu$ mol/100g/min)     | 2.64 $\pm$ 1.01                              | 0.54 $\pm$ 0.24                            | 0.001   |
|                                                                                             | BAT blood flow (mL/100g/min)                    | 16.56 $\pm$ 5.80                             | 11.06 $\pm$ 4.96                           | 0.051   |
|                                                                                             | BAT radiodensity (HU)                           | -82.85 $\pm$ 5.64                            | -88.25 $\pm$ 9.72                          | 0.089   |
|                                                                                             | WAT Fatty Acid Uptake ( $\mu$ mol/100g/min)     | 0.31 $\pm$ 0.12                              | 0.22 $\pm$ 0.067                           | 0.079   |
|                                                                                             | WAT blood flow (mL/100g/min)                    | 2.44 $\pm$ 1.22                              | 2.84 $\pm$ 0.96                            | 0.45    |
|                                                                                             | WAT radiodensity (HU)                           | -83.99 $\pm$ 2.88                            | -83.12 $\pm$ 6.88                          | 0.64    |
|                                                                                             | Deltoid Fatty Acid Uptake ( $\mu$ mol/100g/min) | 0.76 $\pm$ 0.22                              | 0.44 $\pm$ 0.13                            | 0.007   |
|                                                                                             | Deltoid blood flow (mL/100g/min)                | 4.10 $\pm$ 2.84                              | 3.04 $\pm$ 2.97                            | 0.416   |
|                                                                                             | Deltoid radiodensity (HU)                       | 64.44 $\pm$ 14.51                            | 37.49 $\pm$ 34.03                          | 0.008   |
| ROOM TEMPERATURE                                                                            | BAT Fatty Acid Uptake ( $\mu$ mol/100g/min)     | 1.19 $\pm$ 0.43                              | 0.36 $\pm$ 0.22                            | 0.025   |
|                                                                                             | BAT blood flow (mL/100g/min)                    | 6.38 $\pm$ 4.25                              | 7.02 $\pm$ 4.74                            | 0.83    |
|                                                                                             | BAT radiodensity (HU)                           | -86.46 $\pm$ 5.97                            | -89.89 $\pm$ 9.38                          | 0.28    |
|                                                                                             | WAT Fatty Acid Uptake ( $\mu$ mol/100g/min)     | 0.32 $\pm$ 0.13                              | 0.22 $\pm$ 0.10                            | 0.22    |
|                                                                                             | WAT blood flow (mL/100g/min)                    | 1.95 $\pm$ 0.44                              | 3.52 $\pm$ 3.80                            | 0.19    |
|                                                                                             | WAT radiodensity (HU)                           | -84.41 $\pm$ 0.91                            | -83.80 $\pm$ 5.45                          | 0.70    |
|                                                                                             | Deltoid Fatty Acid Uptake ( $\mu$ mol/100g/min) | 0.53 $\pm$ 0.034                             | 0.40 $\pm$ 0.11                            | 0.003   |
|                                                                                             | Deltoid blood flow (mL/100g/min)                | 2.22 $\pm$ 1.85                              | 2.10 $\pm$ 0.89                            | 0.9     |
|                                                                                             | Deltoid radiodensity (HU)                       | 52.44 $\pm$ 17.20                            | 38.02 $\pm$ 29.31                          | 0.13    |
| <b>All data presented as mean <math>\pm</math> SD</b>                                       |                                                 |                                              |                                            |         |
| Unpaired student t-test has been used to compare data between lean and obese study subjects |                                                 |                                              |                                            |         |

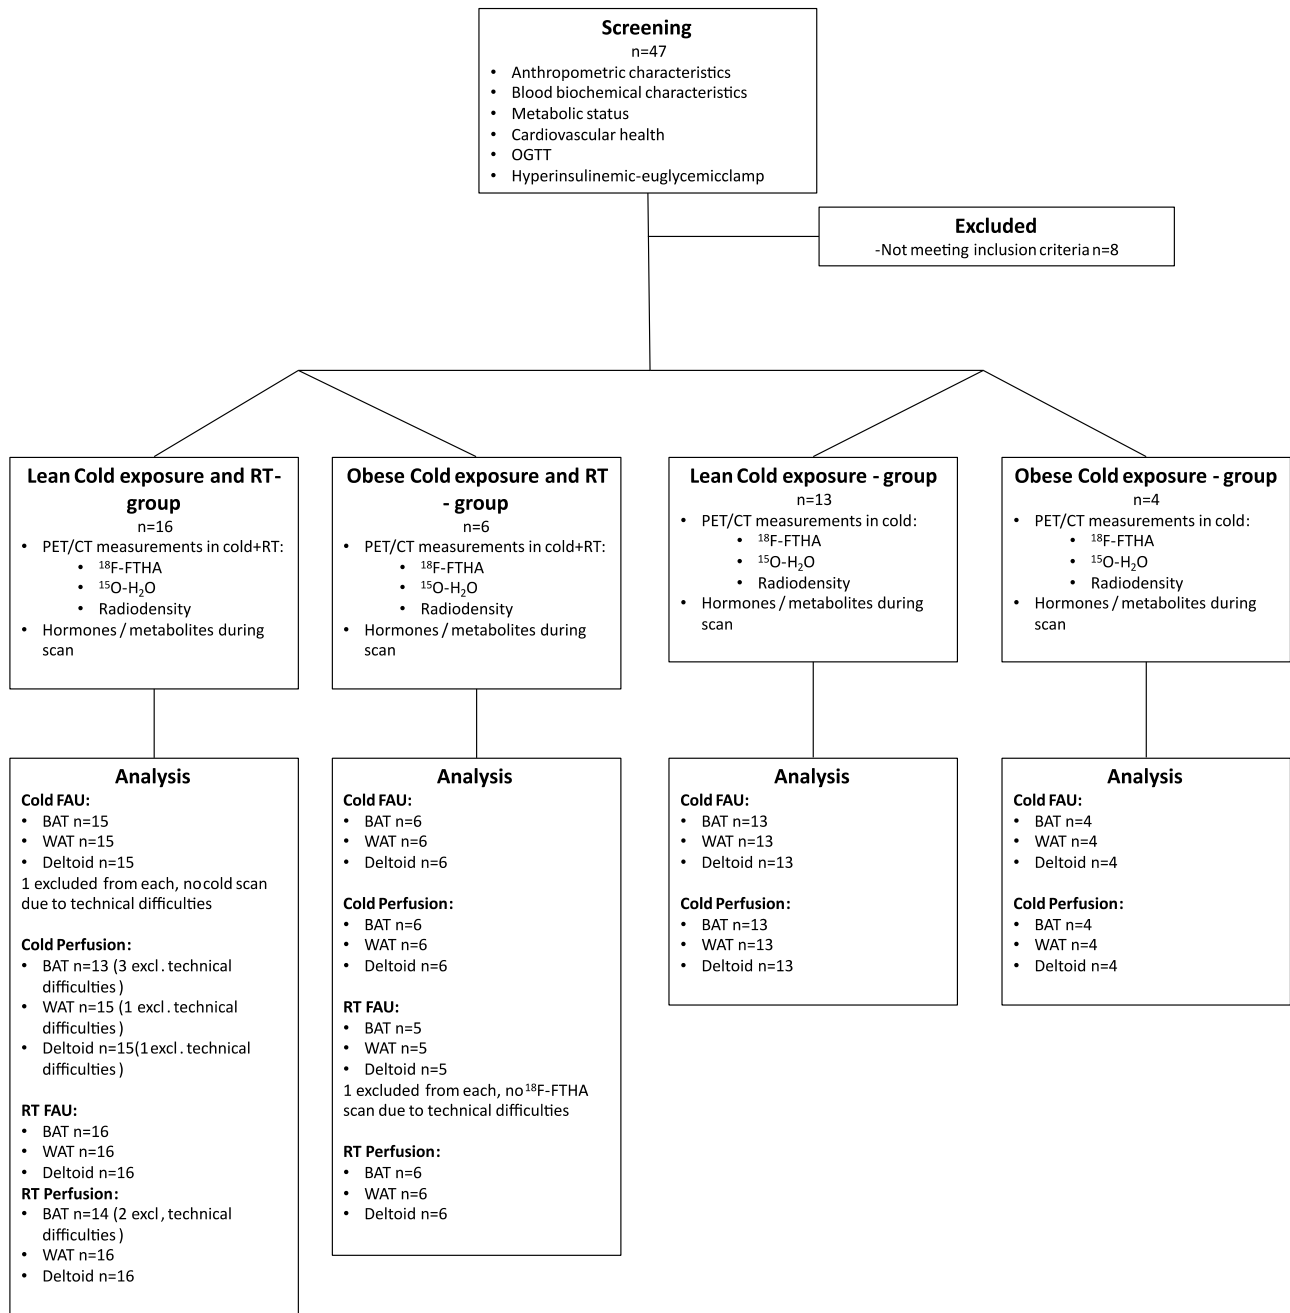

**Supplementary Figure 1.** More detailed version of Figure 2, with all excluded PET measurement details.
